# Supplementary material
Source: publisher site journal article supplement (https://www.spandidos-publications.com/8262/downloadSupplementary)
Supplement: Supplementary file 1 [file downloadSupplementary]

Table SI. Gene-specific primers (human).

| <b>Symbol</b>                  | <b>Name</b>                                        | <b>Assay ID</b> | <b>Interrogated sequence</b> | <b>Exon boundary</b> | <b>Assay location</b> | <b>Amplicon length</b> |
|--------------------------------|----------------------------------------------------|-----------------|------------------------------|----------------------|-----------------------|------------------------|
| <i>CD3G</i>                    | <i>cluster of differentiation 3</i>                | Hs01062241_m1   | NM_000733.3                  | 6-7                  | 606                   | 88                     |
| <i>CD11b</i>                   | <i>integrin alpha M (ITGAM)</i>                    | Hs00167304_m1   | NM_000632.3                  | 8-9                  | 957                   | 77                     |
| <i>CD31</i>                    | <i>platelet endothelial cell adhesion molecule</i> | Hs00169777_m1   | NM_000442.4                  | 14-15                | 2376                  | 65                     |
| <i>CD68</i>                    | <i>cluster of differentiation 68</i>               | Hs00154355_m1   | NM_001040059.1               | 5-6                  | 1042                  | 68                     |
| <i>CD133</i>                   | <i>cluster of differentiation 133</i>              | Hs00195682_m1   | NM_001145849.1               | 2-3                  | 492                   | 107                    |
| <i>CXCL12</i>                  | <i>C-X-C motif chemokine ligand 12</i>             | Hs00171022_m1   | NM_000609.6                  | 2-3                  | 273                   | 77                     |
| <i>CXCL16</i>                  | <i>C-X-C motif chemokine ligand 16</i>             | Hs00222859_m1   | NM_001100812.1               | 3-4                  | 893                   | 62                     |
| <i>CXCR4</i>                   | <i>C-X-C motif chemokine receptor 4</i>            | Hs00237052_m1   | NM_003467.2                  | 1-2                  | 107                   | 78                     |
| <i>CXCR6</i>                   | <i>C-X-C motif chemokine receptor 6</i>            | Hs00174843_m1   | NM_006564.1                  | 1-2                  | 63                    | 59                     |
| <i>CXCR7</i>                   | <i>C-X-C motif chemokine receptor 7</i>            | Hs00664172_s1   | NM_020311.2                  | 2-2                  | 564                   | 73                     |
| <i>CX3CL1</i>                  | <i>C-X3-C motif chemokine ligand 1</i>             | Hs00171086_m1   | NM_002996.4                  | 1-2                  | 183                   | 72                     |
| <i>CX3CR1</i>                  | <i>C-X3-C motif chemokine receptor 1</i>           | Hs00365842_m1   | NM_001337.3                  | 1-2                  | 79                    | 84                     |
| <i>GAPDH</i>                   | <i>glyceraldehyde-3-phosphate dehydrogenase</i>    | Hs99999905_m1   | NM_001289746.1               | 2-2                  | 229                   | 122                    |
| <i>GFAP</i>                    | <i>glial fibrillary acidic protein</i>             | Hs00157674_m1   | NM_002055.4                  | 7-8                  | 1235                  | 75                     |
| <i>Iba1</i>                    | <i>calcium-binding adapter molecule 1</i>          | Hs00610419_g1   | NM_001318970.1               | 2-3                  | 145                   | 92                     |
| <i>IL-1<math>\beta</math></i>  | <i>interleukin-1 beta</i>                          | Hs01555410_m1   | NM_000576.2                  | 3-4                  | 190                   | 91                     |
| <i>IL-1<math>\beta</math>R</i> | <i>interleukin-1 beta receptor</i>                 | Hs00991010_m1   | NM_000877.3                  | 8-9                  | 1168                  | 97                     |
| <i>IL-6</i>                    | <i>interleukin-6</i>                               | Hs00985639_m1   | NM_000600.4                  | 2-3                  | 326                   | 66                     |
| <i>IL-6R</i>                   | <i>interleukin-6 receptor</i>                      | Hs01075664_m1   | NM_000565.3                  | 2-3                  | 769                   | 72                     |
| <i>Ki-67</i>                   | <i>Kiel 67</i>                                     | Hs01032443_m1   | NM_001145966.1               | 7-8                  | 765                   | 66                     |
| <i>KLF4</i>                    | <i>Krüppel-like factor 4</i>                       | Hs00358836_m1   | NM_001314052.1               | 2-3                  | 677                   | 110                    |
| <i>MSI1</i>                    | <i>Musashi RNA-binding protein 1</i>               | Hs00159291_m1   | NM_002442.3                  | 11-12                | 882                   | 92                     |
| <i>OCT4</i>                    | <i>octamer binding transcription factor 4</i>      | Hs00999632_g1   | NM_001173531.2               | 2-3                  | 753                   | 77                     |
| <i>S100B</i>                   | <i>S100 calcium-binding protein B</i>              | Hs00902901_m1   | NM_006272.2                  | 2-3                  | 242                   | 96                     |
| <i>SOX2</i>                    | <i>SRY-box transcription factor 2</i>              | Hs00602736_s1   | NM_003106.3                  | 1-1                  | 164                   | 121                    |

**Table SII.** Antibodies used for immunofluorescence double-staining.

| <b>Marker</b>  | <b>Specificity</b>                 | <b>Epitope/dilution</b>                                                   | <b>Cat. no.</b> | <b>Company</b>                             |
|----------------|------------------------------------|---------------------------------------------------------------------------|-----------------|--------------------------------------------|
| CD3            | cluster of differentiation 3       | Polyclonal rabbit-anti-human IgG/1:200                                    | PA5-29387       | Thermo Fischer Scientific, Inc.            |
| CD11b          | integrin alpha M (ITGAM)           | Monoclonal mouse-anti-human/mouse/rat IgG/1:250                           | sc-1186         | Santa Cruz Biotechnology, Inc.             |
| CD68           | cluster of differentiation 68      | Polyclonal rabbit-anti-human/mouse/rat IgG/1:100                          | sc-9139         | Santa Cruz Biotechnology, Inc.             |
| CD133          | cluster of differentiation 133     | Polyclonal goat-anti-human/mouse/rat IgG/1:200                            | sc-23797        | Santa Cruz Biotechnology, Inc.             |
| CXCL12         | C-X-C motif chemokine ligand 12    | Polyclonal rabbit-anti-human IgG/1:100                                    | ab9797          | Abcam                                      |
| CXCL16         | C-X-C motif chemokine ligand 16    | Polyclonal goat-anti-human IgG/1:100                                      | AF976           | R&D Systems, Inc.                          |
| CXCR4          | C-X-C motif chemokine receptor 4   | Polyclonal rabbit-anti-human/mouse IgG/1:100                              | IMG-125-2.      | Novus Biologicals, LLC                     |
| CXCR6          | C-X-C motif chemokine receptor 6   | Monoclonal mouse-anti-human IgG/ 1:100                                    | MAB699          | R&D Systems, Inc.                          |
| CXCR7          | C-X-C motif chemokine receptor 7   | Monoclonal mouse-anti-human IgG/1:100                                     | MAB42273        | R&D Systems, Inc.                          |
| CX3CL1         | C-X3-C motif chemokine ligand 1    | Monoclonal mouse-anti-human IgG/1:100                                     | MAB3651         | R&D Systems, Inc.                          |
| CX3CR1         | C-X3-C motif chemokine receptor 1  | Polyclonal rabbit-anti-human/rat IgG/1:1,000                              | ab8021          | Abcam                                      |
| GFAP           | glial fibrillary acidic protein    | Monoclonal mouse-anti-human/chicken/pig/rat/bovine/mouse/rabbit IgG/1:500 | MAB3402         | MilliporeSigma                             |
| Iba1           | calcium-binding adapter molecule 1 | Polyclonal goat-anti-human/rat IgG/1:1,000                                | ab5076          | Abcam                                      |
| IL-1 $\beta$   | interleukin-1 beta                 | Polyclonal rabbit-anti-human/mouse/rat IgG/1:100                          | sc7884          | Santa Cruz Biotechnology, Inc.             |
| IL-1 $\beta$ R | interleukin-1 beta receptor        | Polyclonal rabbit-anti-mouse/rat IgG/1:500                                | sc689           | Santa Cruz Biotechnology, Inc.             |
| IL-6           | interleukin-6                      | Monoclonal rabbit-anti-human IgG/1:500                                    | ab214429        | Abcam                                      |
| IL-6R          | interleukin-6 receptor             | Monoclonal rabbit-anti-human IgG/1:50                                     | ab271042        | Abcam                                      |
| KLF4           | Krüppel-like factor 4              | Monoclonal rabbit-anti-human/mouse/rat IgG/1:100                          | MA5-37846       | Invitrogen; Thermo Fisher Scientific, Inc. |
| MSI1           | Musashi RNA-binding protein 1      | Monoclonal mouse-anti-human IgG/1:200                                     | MAB2628         | R&D Systems, Inc.                          |
| OCT4           | octamer binding transcription      | Polyclonal rabbit-anti-human IgG/1:200                                    | 2750            | Cell Signaling Technology, Inc.            |

|       |                                |                                                                    |          |                                |
|-------|--------------------------------|--------------------------------------------------------------------|----------|--------------------------------|
|       | factor 4                       |                                                                    |          |                                |
| S100B | S100 calcium-binding protein B | Polyclonal rabbit-anti-human/rat/bovine/<br>guinea pig IgG/1:5,000 | S2644    | MilliporeSigma                 |
| SOX2  | SRY-box transcription factor 2 | Polyclonal rabbit-anti-human/mouse/rat<br>IgG/1:200                | sc-20088 | Santa Cruz Biotechnology, Inc. |
| vWF   | Von Willebrand factor          | Monoclonal mouse-anti-human IgG/1:100                              | sc-53465 | Santa Cruz Biotechnology, Inc. |
